# 1 Using hospital network-based surveillance for antimicrobial resistance as a more robust 2 alternative to self-reporting

3  
4 *Tjibbe Donker*<sup>1,2,3,x</sup>, *Timo Smieszek*<sup>3,4</sup>, *Katherine L. Henderson*<sup>3</sup>, *Timothy M. Walker*<sup>2</sup>, *Russell*  
5 *Hope*<sup>3</sup>, *Alan P. Johnson*<sup>3</sup>, *Neil Woodford*<sup>1,3</sup>, *Derrick W. Crook*<sup>1,2,3,5</sup>, *Tim E.A. Peto*<sup>1,2,5,\*</sup>, *A. Sarah*  
6 *Walker*<sup>1,2,5,\*</sup>, *Julie V. Robotham*<sup>1,3,\*</sup>.

7  
8 <sup>1</sup> *The National Institute for Health Research (NIHR) Health Protection Research Unit in Healthcare*  
9 *Associated Infections and Antimicrobial Resistance, University of Oxford, Oxford, UK*

10 <sup>2</sup> *Nuffield Department of Medicine, University of Oxford, Oxford, UK*

11 <sup>3</sup> *National Infection Service, Public Health England, Colindale, London, UK*

12 <sup>4</sup> *MRC Centre for Outbreak Analysis and Modelling, Department of Infectious Disease*  
13 *Epidemiology, School of Public Health, Imperial College London, London, United Kingdom*

14 <sup>5</sup> *NIHR Biomedical Research Centre, Oxford, UK*

15 \* These authors contributed equally

16  
17 <sup>x</sup> Corresponding author: *Tjibbe Donker, Nuffield Department of Medicine, University of Oxford,*  
18 *John Radcliffe Hospital, Oxford, OX3 9DU, UK. [tjibbe.donker@ndm.ox.ac.uk](mailto:tjibbe.donker@ndm.ox.ac.uk)*

## 20 Abstract

21 Hospital performance is often measured using self-reported statistics, such as the incidence  
22 of hospital-transmitted micro-organisms or those exhibiting antimicrobial resistance (AMR),  
23 encouraging hospitals with high levels to improve their performance. However, hospitals that  
24 increase screening efforts will appear to have a higher incidence and perform poorly, undermining  
25 comparison between hospitals and disincentivising testing, thus hampering infection control. We  
26 propose a surveillance system in which hospitals test patients previously discharged from other  
27 hospitals and report observed cases. Using NHS Hospital Episode Statistics data, we analysed  
28 patient movements across England and assessed the number of hospitals required to participate in  
29 such a reporting scheme to deliver robust estimates of incidence. With over 1.2 million admissions  
30 to English hospitals previously discharged from other hospitals annually, even when only a fraction  
31 of hospitals (41/155) participate (each screening at least 1000 of these admissions), the proposed  
32 surveillance system can estimate incidence across all hospitals. By reporting on other hospitals, the  
33 reporting of incidence is separated from the task of improving own performance. Therefore the  
34 incentives for increasing performance can be aligned to increase (rather than decrease) screening  
35 efforts, thus delivering both more comparable figures on the AMR problems across hospitals and  
36 improving infection control efforts.

37  
38 **Keywords:** Antimicrobial Resistance; Surveillance; Patient sharing; Healthcare network

## 39 **Introduction**

40

41 Many healthcare systems worldwide mandate the reporting of key hospital statistics to measure  
42 performance[1]. Such self-reported assessments are intended to provide a clear, comparable  
43 overview of each hospital's status, by ranking them based on their reported statistics. Poorly  
44 performing hospitals can then be encouraged to improve using incentives ranging from financial  
45 penalties[2,3] to reputational damage through 'naming and shaming'. The mandatory reporting of  
46 antimicrobial resistance (AMR) and other hospital-transmitted organisms are examples of  
47 commonly used self-reporting systems[4].

48

49 Surveillance systems for AMR are attractive to policy-makers, as they can be used to increase  
50 patient safety by identifying where extra infection prevention and control (IPC) efforts need to be  
51 coordinated, as well as providing insight into the spread and epidemiology of AMR. Changes in  
52 incidence after introducing such systems, like the dramatic decline in methicillin-resistant  
53 *Staphylococcus aureus* (MRSA) bacteraemia after the initiation of the mandatory surveillance  
54 scheme in the United Kingdom[5], have led some to conclude that such self-reporting surveillance  
55 systems help reduce rates.

56

57 However, true incidence of AMR is often hard to measure, because large numbers of affected  
58 patients may be asymptotically colonised[6,7] and thus only found when actively screened.  
59 Hospitals targeting screening strategies to identify more cases may thus worsen their ranking by  
60 increasing their reported incidence. Systems of assessing hospitals based on self-reported carriage  
61 rates may thus unintentionally punish hospitals with stringent testing, screening, and reporting  
62 regimes, because of their seemingly poor performance. Both IPC efforts and hospital performance  
63 monitoring may therefore be hindered by the conflicting incentives: to improve IPC efforts, a  
64 hospital needs to identify as many cases as possible, while it needs to find as few as possible to  
65 improve its performance ranking.

66

67 We explore how to align incentives for hospitals, by separating the task of reporting incidence of a  
68 predominantly carried micro-organism that is acquired in hospital from the task of lowering its  
69 incidence. To do this, we propose a novel surveillance system based on the hospital network formed  
70 by shared patients, namely testing patients that were previously admitted to another hospital to  
71 provide an approximation of the incidence of AMR in that hospital. We show the potential of this  
72 network-based surveillance system to provide incidence estimates, and explore its operational  
73 limits, in particular the number of participating hospitals needed to reliably estimate incidences for  
74 all hospitals. We argue that such a system can provide a more robust surveillance system for AMR  
75 than self-reporting.

76

## 77 **Methods**

78

### 79 *Network-based surveillance system*

80 In the proposed surveillance system (Figure 1), each hospital reports the number of patients  
81 previously admitted to and discharged from other hospitals in a predefined time-frame (e.g. the  
82 previous 12 months) and found to be colonised when screened on admission to this index hospital  
83 (denoted imported cases). The reported numbers of imported cases are then pooled to give the total  
84 number of found cases exported from all the hospitals across the network. For simplicity of  
85 reporting, any untested patients are assumed to not be colonised (providing an incentive to test  
86 admissions previously discharged from elsewhere). The number of imported cases are then divided  
87 by the total number of patients previously discharged from that hospital and admitted to one of the  
88 reporting hospital (which can be obtained from central statistics) to give an estimate of incidence.

89 Alternatively, without loss of generality, numbers tested and testing positive could be reported and  
90 summed to give an estimate of incidence.

91

92 To demonstrate, we use data on patient admissions from the National Health Service (NHS)  
93 Hospital Episode Statistics (HES) to determine the number of patients that were admitted to  
94 different English hospital Trusts (denoted ‘hospitals’) post discharge. We sorted all admissions per  
95 patient by admission date; and for all admissions during 2014-'15 determined whether the previous  
96 discharge happened 1 year before the admission date and whether the previous admission was to a  
97 different hospital to the current one (i.e. the patient was shared between hospitals). Sensitivity  
98 analyses considered 6, 3, 1 month and one week.

99

100 Each hospital had two sets of admissions associated with it: 1) all admissions (the general patient  
101 population), and 2) a subset the admissions of patients previously discharged from another hospital,  
102 now admitted to this hospital (the received patients). The received patient population comes from a  
103 number (potentially all) of the other hospitals. We therefore denote the number of patients  
104 discharged from hospital  $i$  and subsequently admitted to hospital  $j$  as  $m_{ij}$ , where  $s_i = \sum_j m_{ij}$  is the total  
105 shared population size from hospital  $i$ . Under the proposed surveillance scheme, these received  
106 patients should be screened as they are admitted to hospital  $j$  to gather information about the  
107 incidence of hospital-associated pathogens in hospital  $i$ .

108

#### 109 *Coverage*

110 The system consists of the “reporting set”, namely hospitals reporting the number of AMR cases  
111 among their received patients, and the “covered set”, namely hospitals whose discharged patients  
112 are screened as they arrive in other hospitals. We consider a hospital to be part of the covered set  
113 once a fixed number of its discharged patients per year (the reporting threshold) are received by the  
114 hospitals within the reporting set. Thus the reporting set does not necessarily need to include all  
115 hospitals for the covered set to include all hospitals.

116

117 Any hospital sharing fewer patients than this reporting threshold with all other hospitals combined  
118 cannot, by definition, be reported on by such a scheme. Thus the minimum number of patients  
119 shared by hospitals is the highest reporting threshold that can be used ( $n=1216$ ). Taking 1000  
120 shared patients as the reporting threshold, we determined the total number of hospitals that need to  
121 be included in the surveillance scheme to be able to report on all hospitals in three ways; first by  
122 random assignment, second by adding hospitals based on the number of received patients, and third  
123 by adding hospitals using a greedy algorithm.

124

#### 125 *Assignment of hospitals*

126 For the first selection procedure, we randomly added hospitals to the reporting set, one at a time,  
127 calculating the number of hospitals in the covered set after each addition. Hospitals were added to  
128 the reporting set until all hospitals were included in the covered set, repeating this algorithm 100  
129 times. For the second procedure (receipt-based), we sorted hospitals based on the total number of  
130 patients they received from other hospitals, and added them to the reporting set, starting with the  
131 hospital that received most patients and iteratively adding the other hospitals to maximise the  
132 number of received patients added at each step.

133

134 The greedy algorithm iteratively added the hospital to the reporting set that would add the most  
135 hospitals to the covered set. Per step, we calculated for each reporting hospital how many other  
136 hospitals it would add information on (i.e. by how many hospitals the covered set would increase if  
137 this hospital was added to the reporting set). If the number of covered hospitals did not increase by  
138 adding any hospital, the hospital that resulted in the largest increase in number of received patients

139 from hospitals not yet included in the covered set was added. The same procedure was used if two  
140 hospitals resulted in the same increase to the covered set.

141

142 *Reciprocal reporting (snow-ball effect)*

143 We further tested the effect of assuming that covered hospitals will automatically start reporting  
144 once they are themselves reported on, based on the game-theoretical considerations that hospitals  
145 will try to ‘win’ the ranking of reported incidences (supplementary text). After adding a hospital  
146 following the greedy algorithm, we checked if all covered hospitals were present in the reporting set  
147 and added them if they were not. Because the increase in reporting could increase the number of  
148 covered hospitals, this step was repeated until no hospitals were added to the reporting and covered  
149 sets. After this, the next hospital was added to the reporting set using the greedy algorithm again.

150

## 151 **Results**

152 *Network-based surveillance*

153 To test the feasibility of having hospitals report the number of patients previously admitted to other  
154 hospitals that are AMR (or other equivalent carried micro-organism) positive on admission, rather  
155 than self-reporting their own patients colonised on or during admission, we reconstructed the  
156 English hospital network (Figure 2A), based on the NHS Hospital Episode Statistics for England.  
157 The network consisted of 155 hospital organisations (so-called Trusts, denoted ‘hospitals’ for  
158 generalisability) during the financial year 2014-15, admitting 8,681,397 patients for a total of  
159 15,708,764 admissions. A total of 1,208,999 admissions were preceded within a year by a discharge  
160 from a different hospital, mainly concentrated within a small number of strong connections between  
161 hospitals (Figure 2B). The median time between the previous discharge and admission was 28 days  
162 (IQR 6-104), the mean number of overnight stays was 2.1 (IQR 0-2, median 0) for all patient  
163 admissions (Figure 2C), while shared patients stayed 4.6 nights (IQR 0-4, median 1).

164

165 The number of shared patients (patients who were first admitted to a certain hospital, and  
166 subsequently admitted to any of the others) was highest for a tertiary care hospital in the North-East  
167 (23,260 received by others), and lowest for a cancer centre in the North-West (1,216 received by  
168 others). Based on 1,216 as the upper limit of patients that can be received from the least connected  
169 hospital, we set our reporting threshold at 1000. If the maximum time between discharge and  
170 subsequent admission was reduced from a year to a week, the number of subsequent admissions  
171 was reduced by about 78% (Figure 3A), with a total of 264,920 subsequent admissions, of which  
172 5,314 were received from the most-connected (a London teaching hospital) and 232 from the least-  
173 connected (an orthopaedic hospital). Specialist hospitals shared the fewest patients, and higher  
174 thresholds up to 2,989 can be used to include the remaining 146 hospitals when these nine  
175 specialists are excluded.

176

177 A key feature of this system is that hospitals can be included in the covered set even if none of the  
178 individual reporting hospitals receive over the threshold of 1000 patients, as long as all hospitals  
179 combined receive over this threshold. In fact, a median 134 hospitals (of total 155) were required in  
180 a randomly chosen reporting set to provide enough data to include information about all hospitals in  
181 the covered set. Strikingly, a median of only 30 hospitals needed to be included in a randomly  
182 chosen reporting set to survey incidence in half ( $n=78$ ) of the hospitals. Numerous hospitals  
183 received enough patients to be able to individually report on several others (Figure 3B). Four  
184 hospitals each reported on six other hospitals at the 1000-patient threshold (Figure 3C). The number  
185 of hospitals in the covered set (achieving the threshold of  $>1000$  received patients) was always  
186 higher than the number of reporting hospitals (Figure 3D). In contrast, and by definition, any self-  
187 reporting scheme reports only on exactly the numbers of hospitals included in the scheme.

188

189 By selecting hospitals into the reporting set based on the number of patients they received from  
190 other hospitals (labelled “receipt-based” in Figure 3D), the reach of the covered set could be  
191 substantially improved, with incidence estimated from >1000 patients in half the hospitals after  
192 including just 16 hospitals in the reporting set. However, to estimate incidence in all hospitals, this  
193 selection procedure still needed to include 101 hospitals in the reporting set.

194  
195 A “greedy” algorithm significantly outperformed both the random and receipt-based additions to the  
196 reporting set, increasing the covered set faster and providing the largest number of covered  
197 hospitals (with incidence estimated from >1000 patients) for any number of reporting hospitals. The  
198 difference between the greedy algorithm and the receipt-based selection was largest for the last 50  
199 covered hospitals. Incidence could be estimated from >1000 patients in all hospitals after adding  
200 only 41 hospitals to the reporting set using the greedy algorithm (Figure 3D & 4A), while only 13  
201 reporting hospitals were needed to survey 50% of all hospitals.

202  
203 In the so-called “snowball” scenario, where hospitals start reporting if they are reported on, the  
204 number of reporting hospitals quickly expands. After the first hospital starts reporting its received  
205 cases, its neighbours will join, followed by their neighbours, each time increasing the number of  
206 received cases that are reported and the likelihood of other hospitals adding themselves to the  
207 covered set (Figure 4B). For most randomly selected starting hospitals, this resulted in all hospitals  
208 eventually being included in the reporting set. Only if the first hospital was small enough to not  
209 receive >1000 patients from any particular hospital did the first step not result in the addition of  
210 more hospitals to the reporting set (occurring with probability  $19/155=0.12$ ). For a group of nine  
211 hospitals in the North, the snowball-addition stopped when the whole group was added, as the nine  
212 hospitals combined did not receive >1000 patients from any other hospitals.

## 213 214 **Discussion**

215 To have the desired effect, incentives for hospitals to reduce their reported rates of AMR and other  
216 hospital-transmitted organisms need to align with the hospitals’ interests to reduce their numbers of  
217 colonised and infected patients. We show that this can be done by having hospitals report the  
218 number of cases among the patients they admit who have previously been discharged from other  
219 hospitals, as it separates the tasks of reporting and reducing incidence. In this way, hospitals report  
220 on the AMR incidence in other hospitals, not on their own incidence, and as a result they  
221 themselves do not suffer potential consequences from their reports. Additionally, if the recipient  
222 hospital is then rewarded for any case they find, a clear incentive is constructed to find as many  
223 cases as possible discharged from other hospitals, delivering a more reliable incidence estimate.

224  
225 The proposed surveillance system intrinsically increases the number of covered hospitals. First and  
226 foremost, by reporting cases admitted after previously being discharged from other hospitals, not all  
227 hospitals need to participate for it to be possible to estimate incidence for all hospitals. In fact, a  
228 selected subset of only 26% of English hospitals resulted in enough patients admitted to another  
229 hospital within a year after discharge to estimate incidence in all hospitals in England. Even if  
230 hospitals join the surveillance system (the reporting set) at random, incidences for all hospitals can  
231 be obtained before all hospitals are reporting. The system therefore provides incidence estimates for  
232 more hospitals than participate. Furthermore, because the reported incidence for a certain hospital  
233 will often be the result of the pooled reports sent in by several other hospitals, the final measured  
234 incidence is less influenced by the screening rates of individual hospitals. The ranking of hospitals  
235 based on the agglomerated measurement can therefore be expected to be more robust than any  
236 measurement derived from single hospitals.

237  
238 The number of hospitals participating in such a surveillance scheme could easily increase if

239 hospitals were compensated for cases they find among patients admitted after having been  
240 discharged from another hospital, since there is no clear disadvantage to screening imported patients  
241 and reporting found cases. Subsequently, this effect may cause more hospitals to join: if a hospital's  
242 incidence is reported by other hospitals, it may be inclined to start testing patients it admits after  
243 they have been discharged from other hospitals, if only to be able to compare incidences. Due to  
244 this snow-ball effect the system may not need to be mandatory, although a core group of  
245 participating hospitals may be desirable.

246  
247 If the goal of reporting incidence changes from purely gathering information to creating incentives  
248 for improving performance by penalising hospitals with high incidences, either financially or  
249 reputationally, the proposed surveillance system still has value, because any repercussions  
250 associated with high incidence are incurred by a different hospital than the one that is screening  
251 patients. However, exactly which cases might be counted when penalising hospitals needs to be  
252 carefully considered. To promote information sharing between hospitals, only newly discovered  
253 AMR-positive patients should be used to determine penalties, and not those patients that were  
254 previously screened and labelled as carriers, to prevent the punishment of hospitals that actively try  
255 to share information about cases identified among their admitted patient population with other  
256 hospitals.

257  
258 The proposed surveillance scheme exploits the structure of the hospital network, showing the added  
259 value of regarding hospitals as interconnected by shared patients instead of completely independent  
260 and isolated entities[8–12]. Previous studies have shown that patient sharing between hospitals  
261 significantly correlate with rates of Carbapenemase-Producing Enterobacteriaceae (CPE)[13],  
262 MRSA[14] or Clostridium difficile[15,16]. The influence of the hospital network formed by shared  
263 patients on the spread of hospital-associated pathogens has also been used to design early warning  
264 systems[16,17] or inform the distribution of resources for IPC[18], often reiterating the importance  
265 of centrally located hospitals. We present a novel viewpoint on using these hospital networks, by  
266 considering the interests of hospitals to report cases, thus actively using the shared patients to  
267 combat the spread of these pathogens.

268  
269 *Limitations*

270 The estimated incidence of a specific hospital measured by the reporting hospitals will not be  
271 identical to incidence measured within the specific hospital itself, because the readmitted patients  
272 are a specific subset of the original patient population and more likely carriers. However, readmitted  
273 populations will generally be broadly comparable between hospitals. Further, whilst this estimate  
274 may not precisely reflect the true incidence in a specific hospital, arguably neither does the self-  
275 reported rate. Comparing estimated incidences for hospitals with vastly different function, such as  
276 specialist hospitals, that have substantially different case-mix from the other hospitals, may need to  
277 be done carefully, for example using adjustment, as for standardised mortality rates.

278  
279 We assumed that receiving hospitals are aware of patients' previous hospital stays upon admission,  
280 to identify those that need to be screened. However, this may not necessarily be the case, in  
281 particular when the time since last discharge is relatively long. Reported incidences may therefore  
282 be slightly lower, because some shared patients might be missed. Although this would lower the  
283 surveillance system's accuracy, the bias would be similar for all hospitals; in particular because  
284 multiple hospitals can report on each covered hospital, any inaccuracies on the single reporting  
285 hospital level will be averaged out.

286  
287 We considered a cut-off for screening admissions of 1 year from previous discharge; in the general  
288 community, bacterial carriage may or may not persist over this period, making it harder to attribute

289 colonisation status to the previous hospitalisation with confidence the longer a previous admission  
290 was in the past. This is particularly problematic if levels of community transmission start to exceed  
291 hospital-associated transmission. By shortening the cut-off time, the specificity of the surveillance  
292 system will increase, at the cost of its sensitivity. However, by recording all colonised patients who  
293 were previously admitted to another hospital, together with the time between admissions, it should  
294 be possible to estimate the relative contribution of community transmission to the importation of  
295 cases to all hospitals.

296

### 297 **Conclusion**

298 We propose a new system to estimate incidences of AMR and other hospital-transmitted micro-  
299 organisms that does not rely on self-reporting, whereby instead surrounding hospitals report the  
300 incidence within the patient population admitted to their hospital who have recently being  
301 discharged from other hospitals. This decoupling of the hospital that is reporting from the hospital  
302 reported on is vital for delivering reliable incidence estimates, as it takes away the incentive to stop  
303 looking for cases by watching over the others. By reporting on other hospitals' incidence, the  
304 surveillance scheme aligns financial and patient safety interests, encouraging hospitals to find and  
305 report as many cases as possible, making the surveillance scheme more resilient against 'gaming'  
306 and thus delivering a more robust comparison between hospitals.

307

### 308 **Supplementary information**

309 Supplementary text: The game-theoretical implications of surveillance schemes

310

311 Supplementary table 1: Numbers of shared patients between hospitals, for cut-off time between  
312 admissions: one year, six months, three months, one month, and one week. Including list of hospital  
313 codes and names.

314

### 315 **Abbreviations**

|          |                                                    |
|----------|----------------------------------------------------|
| 316 AMR  | antimicrobial resistance                           |
| 317 CPE  | carbapenemase-producing enterobacteriaceae         |
| 318 HES  | hospital episode statistics                        |
| 319 IPC  | infection prevention and control                   |
| 320 MRSA | methicillin-resistant <i>Staphylococcus aureus</i> |
| 321 NHS  | National Health Service                            |

322

### 323 **Authors' contributions**

324 TD, ASW, and JVR designed the study. TD and TS performed the analysis. KLH provided data.  
325 TD, TS, ASW, and JVR drafted the manuscript All authors revised the manuscript and gave final  
326 approval for publication.

327

### 328 **Funding**

329 The research was funded by the National Institute for Health Research Health Protection Research  
330 Unit (NIHR HPRU) in Healthcare Associated Infections and Antimicrobial Resistance at University  
331 of Oxford in partnership with PHE [grant number HPRU-2012-10041]. ASW, TEAP and DWC are  
332 supported by the NIHR Oxford Biomedical Research Centre. TEAP and DWC are NIHR Senior  
333 Investigators. The views expressed are those of the author(s) and not necessarily those of the NHS,  
334 the NIHR, the Department of Health or Public Health England.

335

### 336 **Conflict of Interest**

337 All authors declare no support from any organisation for the submitted work; NW has received  
338 research grants from Wockhardt, Merck Sharp & Dohme Corp, Roche, Meiji Seika, Enigma

339 Diagnostics, Bio-Rad, Biomerieux, Accelerate, BD Diagnostics, Astrazeneca, Check points,  
340 GlaxoSmithKline, Kalidex, Malinta, Momentum, Norgine, Rempex, Rotikan, Smith&Nephew,  
341 Venato Rx Pharmaceuticals, and Basilea for research projects or contracted evaluations. There were  
342 no other relationships or activities that could appear to have influenced the submitted work.

343

#### 344 **Availability of data and materials**

345 The patient admission data were not collected for this study specifically, and the authors do not own  
346 the used datasets. Patient admission data from the English NHS HES (Hospital Episode Statistics.  
347 Copyright© 2015. Re-used with the permission of the Health and Social Care Information Centre.  
348 All rights reserved.) are available for researchers who meet the criteria for access to confidential  
349 data from NHS digital (digital.nhs.uk; Formerly Health and Social Care Information Centre). All  
350 other data needed to reproduce the analysis is provided in the supplementary information.

351

#### 352 **References**

- 353 1. Freeman T. Using performance indicators to improve health care quality in the public sector: a  
354 review of the literature. *Heal Serv Manag Res.* 2002;15:126–37.
- 355 2. Hibbard JH, Stockard J, Tusler M. Does publicizing hospital performance stimulate quality  
356 improvement efforts? *Health Aff.* 2003;22:84–94.
- 357 3. Maynard A, Bloor K. Will financial incentives and penalties improve hospital care? *BMJ.*  
358 2010;340:c88.
- 359 4. Health Protection Agency. Quarterly Epidemiological Commentary: Mandatory MRSA, MSSA  
360 and E. coli bacteraemia, and C. difficile infection data (up to October – December 2012). 2013;1–  
361 8.
- 362 5. Johnson AP, Davies J, Guy R, Abernethy J, Sheridan E, Pearson A, et al. Mandatory surveillance  
363 of methicillin-resistant Staphylococcus aureus (MRSA) bacteraemia in England: the first 10 years. *J*  
364 *Antimicrob Chemother.* 2012;67:802–9.
- 365 6. Wertheim HF, Melles DC, Vos MC, van Leeuwen W, van Belkum A, Verbrugh H a, et al. The  
366 role of nasal carriage in Staphylococcus aureus infections. *Lancet Infect Dis.* 2005;5:751–62.
- 367 7. Calfee DP, Durbin LJ, Germanson TP, Toney DM, Smith EB, Farr BM. Spread of methicillin-  
368 resistant Staphylococcus aureus (MRSA) among household contacts of individuals with  
369 nosocomially acquired MRSA. *Infect Control Hosp Epidemiol.* 2003;24:422–6.
- 370 8. Donker T, Wallinga J, Grundmann H. Patient referral patterns and the spread of hospital-acquired  
371 infections through national health care networks. *PLoS Comput Biol.* 2010;6:e1000715.
- 372 9. Iwashyna TJ, Christie JD, Moody J, Kahn JM, Asch DA. The structure of critical care transfer  
373 networks. *Med Care.* NIH Public Access; 2009;47:787–93.
- 374 10. Nekkab N, Astagneau P, Temime L, Crépey P. Spread of hospital-acquired infections: A  
375 comparison of healthcare networks. *PLOS Comput Biol.* 2017;13:e1005666.
- 376 11. Huang SS, Avery TR, Song Y, Elkins KR, Nguyen CC, Nutter SK, et al. Quantifying  
377 interhospital patient sharing as a mechanism for infectious disease spread. *Infect Control Hosp*  
378 *Epidemiol.* 2010;31:1160–9.
- 379 12. Lee BY, McGlone SM, Song Y, Avery TR, Eubank S, Chang CC, et al. Social network analysis  
380 of patient sharing among hospitals in Orange County, California. *Am J Public Health.*  
381 2011;101:707–13.
- 382 13. Ray MJ, Lin MY, Weinstein RA, Trick WE. Spread of Carbapenem-Resistant



- 383 Enterobacteriaceae Among Illinois Healthcare Facilities: The Role of Patient Sharing. 2016;1–5.
- 384 14. Donker T, Wallinga J, Slack R, Grundmann H. Hospital networks and the dispersal of hospital-  
385 acquired pathogens by patient transfer. PLoS One. 2012;7:e35002.
- 386 15. Simmering JE, Polgreen L a., Campbell DR, Cavanaugh JE, Polgreen PM. Hospital Transfer  
387 Network Structure as a Risk Factor for Clostridium difficile Infection. Infect Control Hosp  
388 Epidemiol. 2015;1–7.
- 389 16. Fernández-Gracia J, Onnela J-P, Barnett ML, Eguíluz VM, Christakis NA. Influence of a patient  
390 transfer network of US inpatient facilities on the incidence of nosocomial infections. Sci Rep.  
391 2017;7:2930.
- 392 17. Ciccolini M, Spoorenberg V, Geerlings SE, Prins JM, Grundmann H. Using an index-based  
393 approach to assess the population-level appropriateness of empirical antibiotic therapy. J  
394 Antimicrob Chemother. 2014;1–8.
- 395 18. Karkada UH, Adamic L a, Kahn JM, Iwashyna TJ. Limiting the spread of highly resistant  
396 hospital-acquired microorganisms via critical care transfers: a simulation study. Intensive Care  
397 Med. 2011;37:1633–40.
- 398
- 399

## 400 Figures

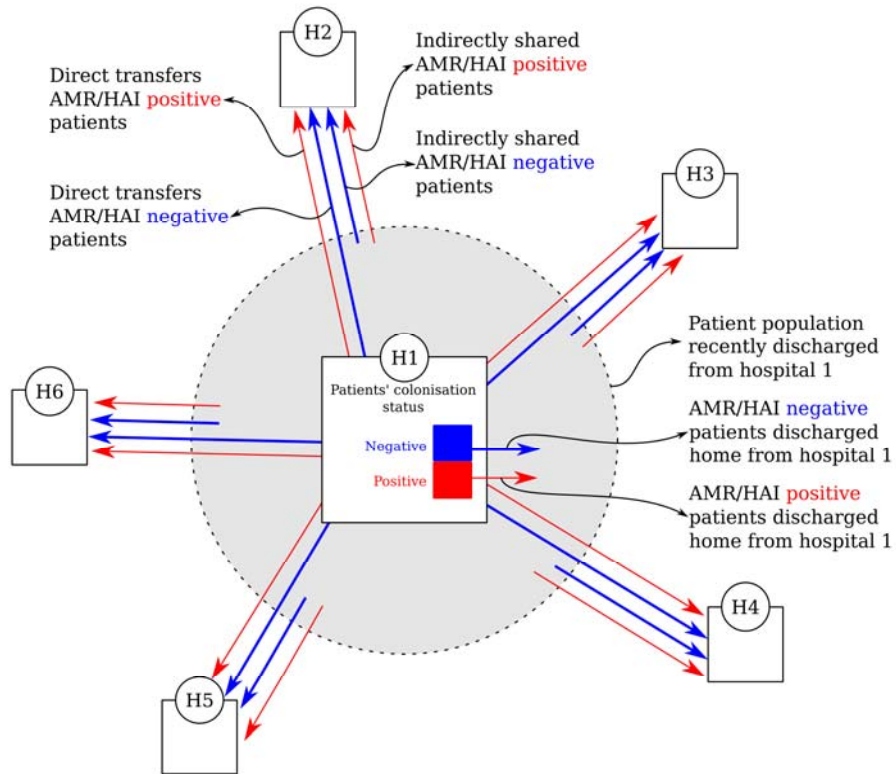

401

402 Figure 1) Schematic representation of the proposed surveillance system. A proportion of the  
403 patients discharged from hospital 1 will be directly transferred or indirectly readmitted to hospitals  
404 2-6. These shared patients may carry AMR acquired in hospital 1. By reporting these colonised  
405 patients, as well as the total number of shared patients, hospitals 2-6 can estimate an AMR  
406 incidence for hospital 1 without hospital 1 reporting.

407

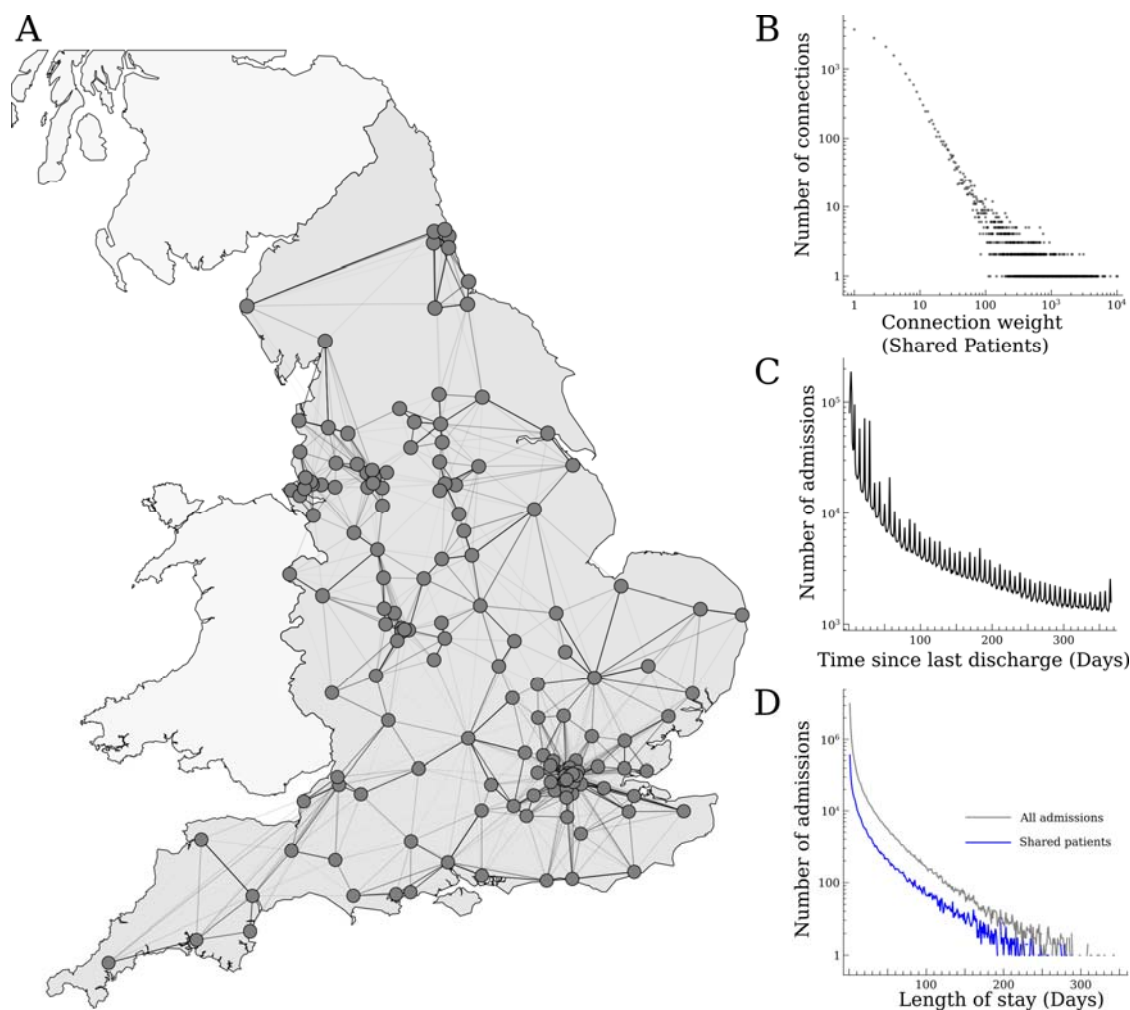

408

409 Figure 2) The English hospital network. A) The location of the included hospitals (dots), showing  
410 the connections and connection weights based on patients shared between them (admitted to one  
411 hospital having previously been discharged from another) (lines, darkness indicating the number of  
412 shared patients). B) The distribution of connection weights between all hospitals. C) The  
413 distribution of time between admissions, measured as days since previous discharge. D) The  
414 distribution of lengths of stay, for all admissions (grey) and shared patients (blue).

415

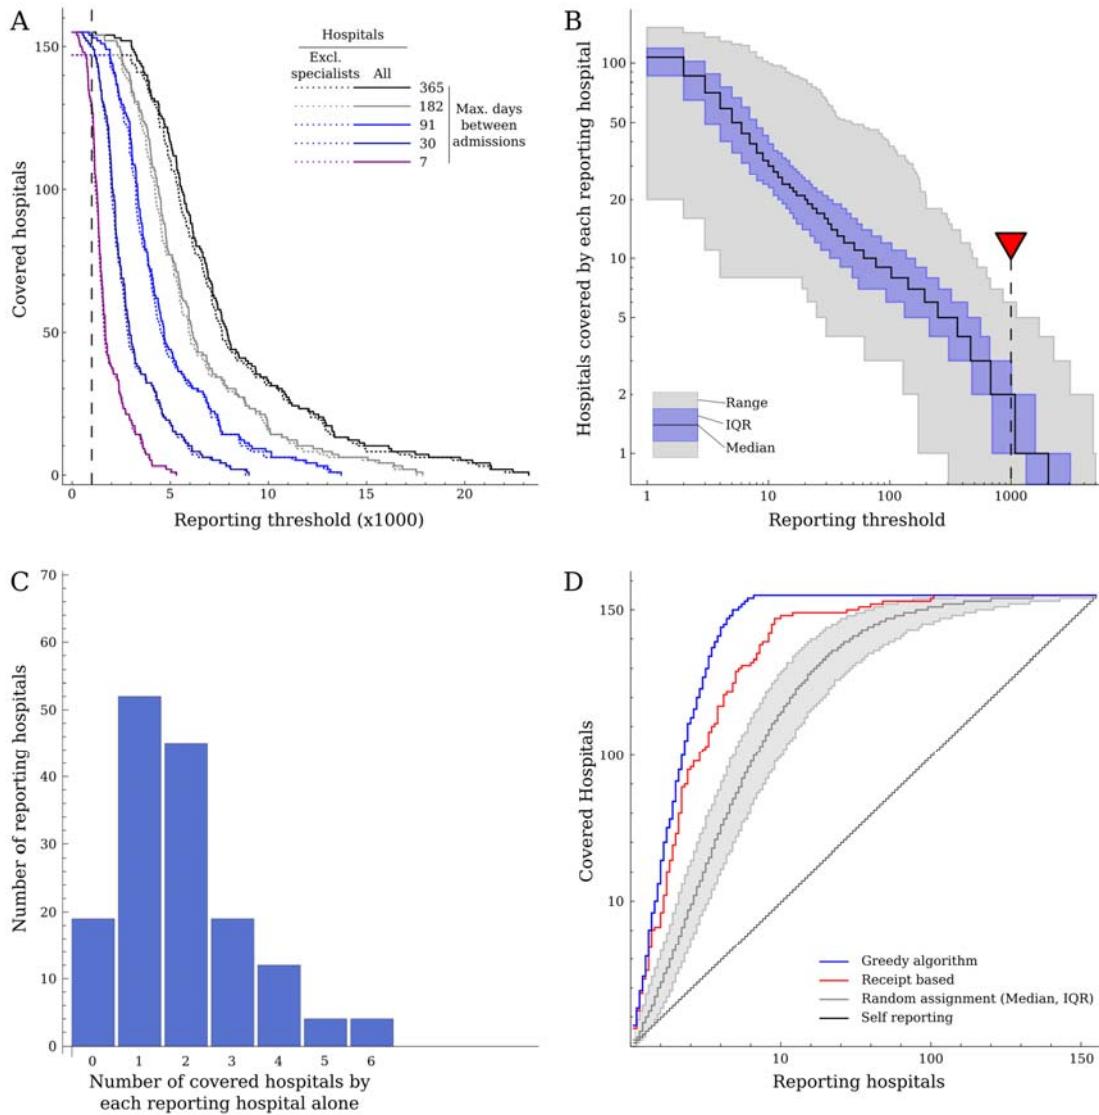

416

417 Figure 3) A) The number of patients discharged from each hospital and subsequently admitted  
 418 elsewhere for different maximum periods between last discharge and next admission. If previous  
 419 discharges within a year are included, all hospitals discharge over 1000 patients who are  
 420 subsequently admitted elsewhere within a year. B) The number of hospitals that are covered by each  
 421 reporting hospital individually, as a function of the threshold number of received patients. C) The  
 422 number of hospitals that are covered by each reporting hospital individually, for a threshold of 1000  
 423 received patients (shown by red triangle in B). D) The number of hospitals covered as a function of  
 424 the number of reporting hospitals using self-reporting (black line) as well as the proposed  
 425 surveillance scheme with the reporting set determined by random assignment (grey), receipt-based  
 426 assignment (blue) and the greedy algorithm (blue).

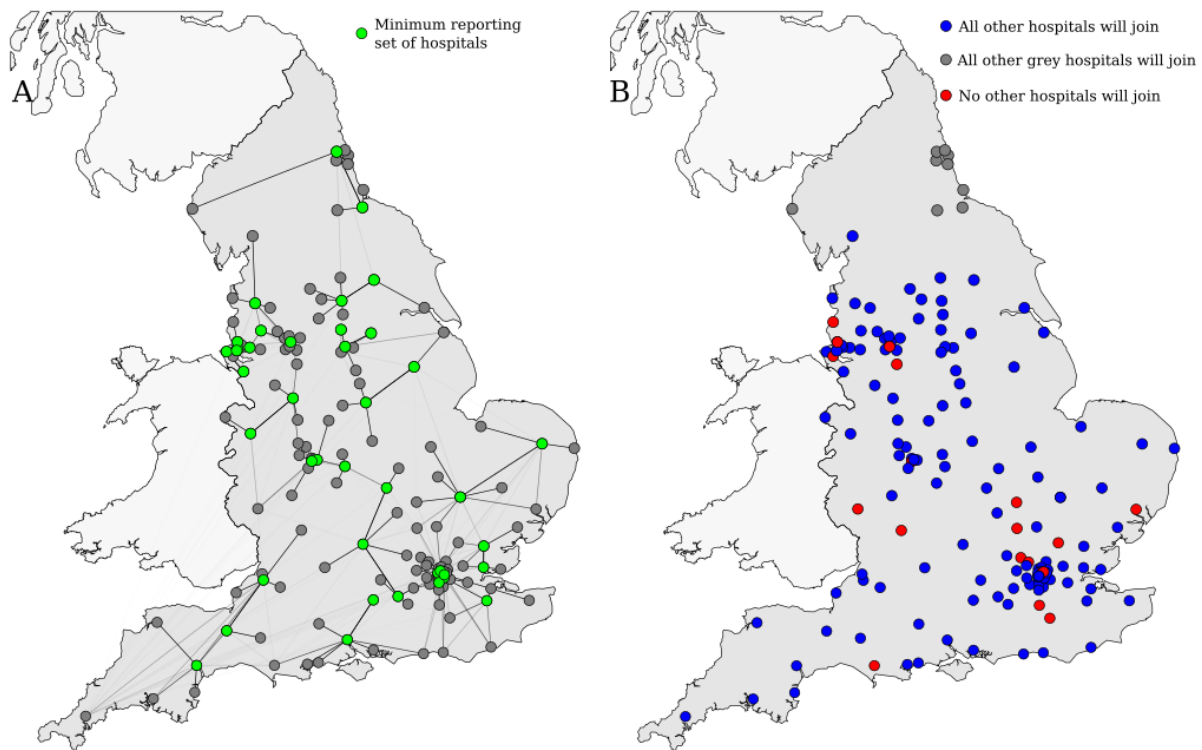

427

428 Figure 4) The geographical distribution of hospitals in the surveillance scheme. A) The minimal set  
429 of reporting hospitals needed to report on all hospitals, as found using the greedy algorithm. Green  
430 dots show the reporting set, grey dots the covered set and lines show the links over which patients  
431 previously discharged from other hospitals are included. B) The result of the snow-ball assumption  
432 (a hospital will start reporting once it is reported on) as a function of the first hospital to join the  
433 surveillance scheme. For the majority of hospitals (127/155), all other hospitals would join the  
434 scheme were they the first hospital to start reporting (blue dots). However, a small group in the  
435 North region (9/155) will only report on hospitals in the same region (grey dots), while for small  
436 number of hospitals (19/155) no others will join if they are the first in the surveillance system (red  
437 dots), because they do not receive over 1000 patients per year from any other single hospital, and  
438 hence no other hospitals will therefore be reported on and join the scheme.

439

440
